# 1 **Muscle-specific economy of force generation and efficiency of work** 2 **production during human running**

3  
4 Sebastian Bohm<sup>1,2\*</sup>, Falk Mersmann<sup>1,2</sup>, Alessandro Santuz<sup>1,2</sup>, Arno Schroll<sup>1,2</sup> & Adamantios  
5 Arampatzis<sup>1,2</sup>

6 1: Humboldt-Universität zu Berlin, Department of Training and Movement Sciences, Philippstr. 13,  
7 10115 Berlin, Germany

8 2: Berlin School of Movement Science, Humboldt-Universität zu Berlin, Berlin, Germany

## 9 **\* Corresponding author:**

10 Sebastian Bohm  
11 Humboldt-Universität zu Berlin  
12 Department of Training and Movement Sciences  
13 Philippstr. 13, House 11  
14 10115 Berlin, Germany  
15 phone: +49 (0) 30 2093-46010  
16 e-mail: [sebastian.bohm@hu-berlin.de](mailto:sebastian.bohm@hu-berlin.de)

17

18

19

## 20 **Abstract**

21 Human running features a spring-like interaction of body and ground, enabled by elastic tendons that  
22 store mechanical energy and facilitate muscle operating conditions to minimize the metabolic cost. By  
23 experimentally assessing the operating conditions of two important muscles for running, the soleus and  
24 vastus lateralis, we investigated physiological mechanisms of muscle energy production and muscle  
25 force generation. Results showed that the soleus continuously shortened throughout the stance phase,  
26 operating as energy generator under conditions that were found to be optimal for work production: high  
27 force-length potential and enthalpy efficiency. The vastus lateralis promoted tendon energy storage and  
28 contracted nearly isometrically close to optimal length, resulting in a high force-length-velocity potential  
29 beneficial for economical force generation. The favorable operating conditions of both muscles were a  
30 result of an effective length and velocity-decoupling of fascicles and muscle-tendon unit mostly due to  
31 tendon compliance and, in the soleus, marginally by fascicle rotation.

32

33

34 **Key words:** force-length and force-velocity relationship, enthalpy-velocity relationship, soleus and  
35 vastus lateralis muscle, length and velocity-decoupling, tendon elasticity, metabolic cost of running

36

## 37 Introduction

38 During locomotion, muscles generate force and perform work in order to support and accelerate the  
39 body and the activation of the lower limb muscles accounts for most of the metabolic energy cost needed  
40 to walk or run [1–3]. Running is characterized by a spring-like interaction of the body with the ground,  
41 indicating temporally storage of kinetic and potential energy from the body in elastic elements, mainly  
42 tendons, as strain energy that can be recovered in the propulsive second half of the stance phase [3–  
43 5]. Storing mechanical energy in elastic tendons reduces the required energy production by the muscles  
44 through active shortening, which leads to lower metabolic energy cost [6–8] and a decrease in active  
45 muscle volume [4,9,10]. Thus, the consequence of this spring-like behavior is a reduction in the  
46 metabolic cost of running and an improvement in running economy.

47 At the muscle level, however, it has been shown that the triceps surae muscle group produces muscular  
48 work/energy during the stance phase of steady-state running [11]. The soleus is the largest muscle in  
49 this group [12] and does work by active shortening throughout the entire stance phase [13,14]. In the  
50 first part of the stance phase, the performed muscular work is stored in the Achilles tendon as elastic  
51 strain energy. During the later propulsion phase, the tendon strain energy recoil contributes to the  
52 muscular energy production, suggesting an energy amplification behavior [4] within the triceps surae  
53 muscle-tendon unit (MTU) during running. On the contrary, the vastus lateralis muscle (VL), as the main  
54 muscle of the quadriceps femoris muscle group [15], operates nearly isometrically despite a lengthening-  
55 shortening behavior of the VL MTU [16,17]. The almost isometric contraction suggests a negligible  
56 mechanical work production by the VL during running and a spring-like energy exchange between body  
57 and VL MTU, i.e. promoting energy conservation [3,4].

58 The triceps surae and the quadriceps muscle group are considered to be crucial for running performance  
59 [18,19]. The quadriceps femoris decelerates and supports the body early in stance while the triceps  
60 surae accounts for the propulsion later in the stance [18,20,21]. The soleus and VL, as the main muscles  
61 of both muscle groups, show marked differences in their morphological and architectural properties with  
62 shorter fascicles and higher pennation angles in the soleus [13,22] compared to VL [16,23]. Because of  
63 the long fascicles of the VL, a unit of force generated by this muscle is metabolically more expensive  
64 [10] compared to the soleus. Our previous findings [16] suggest that the VL operates at a high force-  
65 length-velocity potential (fraction of maximum force according to the force-length [24] and force-velocity  
66 [8] curves [13,16,25]) during running, which would indicate a fascicle contraction condition that could  
67 minimize the energetic cost of muscle force generation. The soleus muscle instead operates as an  
68 muscular energy generator through active shortening, which decreases the force-velocity potential  
69 [13,14] and may increase the energetic cost of muscle force generation, marking a trade-off between  
70 mechanical work production and metabolic expenses. When muscle fascicles shorten, the enthalpy  
71 efficiency [26] (or mechanical efficiency [27,28]) quantifies the fraction of ATP hydrolysis that is  
72 converted into mechanical work and depends on the shortening velocity, with a steep increase at low  
73 shortening velocities up to a maximum at around 20% of the maximum shortening velocity ( $V_{max}$ ) and a  
74 decrease thereafter [27–29]. Previous findings suggest that the soleus fascicles continuously shorten at  
75 a moderate velocity during the stance phase of running [13], covering a range that corresponds to a

76 high efficiency. Therefore, the soleus muscle may operate at fascicle conditions that would be beneficial  
77 for economical work/energy production.

78 The muscle fascicle behavior is strongly influenced by the decoupling of the fascicles from the MTU  
79 excursions due to tendon elasticity and fascicle rotation [30–33]. The previously reported decoupling of  
80 the soleus muscle indicates that tendon elasticity and fascicle rotation affect the operating fascicle length  
81 and velocity during running [13,34], however their integration in the regulation of the efficiency-fascicle  
82 velocity dependency is unclear. Regarding the VL muscle, it was suggested that proximal muscles like  
83 the knee extensors feature shorter and less compliant tendons compared to the distal triceps surae  
84 muscles, thus limiting the decoupling between fascicles and MTU [35–37]. However, in our previous  
85 study, we found significantly smaller VL fascicle length changes compared to the VL MTU [16], indicating  
86 an important decoupling within the VL MTU due to tendon elasticity.

87 The purpose of this study was to assess the soleus and the VL fascicle behavior with regard to the  
88 operating force-length-velocity potential and enthalpy efficiency to investigate physiological mechanisms  
89 for muscle energy production and muscle force generation during running. We hypothesized that the  
90 soleus muscle as an energy generator operates at a high force-length potential and a high enthalpy  
91 efficiency, minimizing the metabolic cost of energy production. On the other hand, for the VL muscle  
92 that promotes energy conservation, we hypothesized a high force-length and a high force-velocity  
93 potential that would reduce the metabolic energy cost of muscle force generation. In order to investigate  
94 the regulation of the efficiency and force potentials, we further quantified the length and velocity  
95 decoupling of the fascicles from the MTU as well as the electromyographic (EMG) activation.

96  
97

## 98 **Results**

99 There were no significant differences in the anthropometric characteristics between groups (age  $p =$   
100  $0.369$ , height  $p = 0.536$ , body mass  $p = 0.057$ ). The experimentally assessed  $L_0$  of the soleus was on  
101 average  $41.3 \pm 5.2$  mm and significantly shorter than  $L_0$  of the VL with  $94.0 \pm 11.6$  mm ( $p < 0.001$ ). The  
102 corresponding  $F_{\max}$  of the soleus was  $2887 \pm 724$  N, which was significantly lower compared to the  $4990$   
103  $\pm 914$  N of the VL ( $p < 0.001$ ). Furthermore, the assessed  $V_{\max}$  was  $279 \pm 35$  mm/s for the soleus,  
104 significantly lower than the  $V_{\max}$  of the VL with  $1082 \pm 133$  mm/s ( $p < 0.001$ ).

105 The stance and swing times during running were  $304 \pm 23$  ms and  $439 \pm 26$  ms for the soleus group  
106 and  $290 \pm 22$  ms and  $448 \pm 30$  ms for the VL group ( $p = 0.075$ ,  $p = 0.369$ ). The EMG comparison showed  
107 that the soleus was active throughout the entire stance phase of running while the VL was mainly active  
108 in the first part of the stance and with an earlier peak of activation (soleus  $41 \pm 5\%$  of stance phase, VL  
109  $35 \pm 4\%$  of stance phase,  $p < 0.001$ , fig. 1). During the stance phase, the MTU of both muscles showed  
110 a lengthening-shortening behavior, but the VL MTU started to shorten earlier (soleus  $59 \pm 2\%$  of stance  
111 phase, VL  $50 \pm 2\%$  of stance phase,  $p < 0.001$ , fig. 1). The soleus and the VL fascicle length were clearly  
112 decoupled from the MTU length with smaller operating length ranges throughout the whole stance (fig.  
113 1). The soleus fascicles operated at a length close to  $L_0$  at touchdown and then shortened continuously  
114 until the foot lift-off ( $0.994$  to  $0.752$   $L/L_0$ , fig. 1). The operating length of the VL fascicles remained above  
115  $L_0$  over the entire stance phase and was on average significantly longer compared to the soleus fascicles  
116 (soleus  $0.899 \pm 0.104$   $L/L_0$ , VL  $1.054 \pm 0.082$   $L/L_0$ ,  $p < 0.001$ , fig. 1).

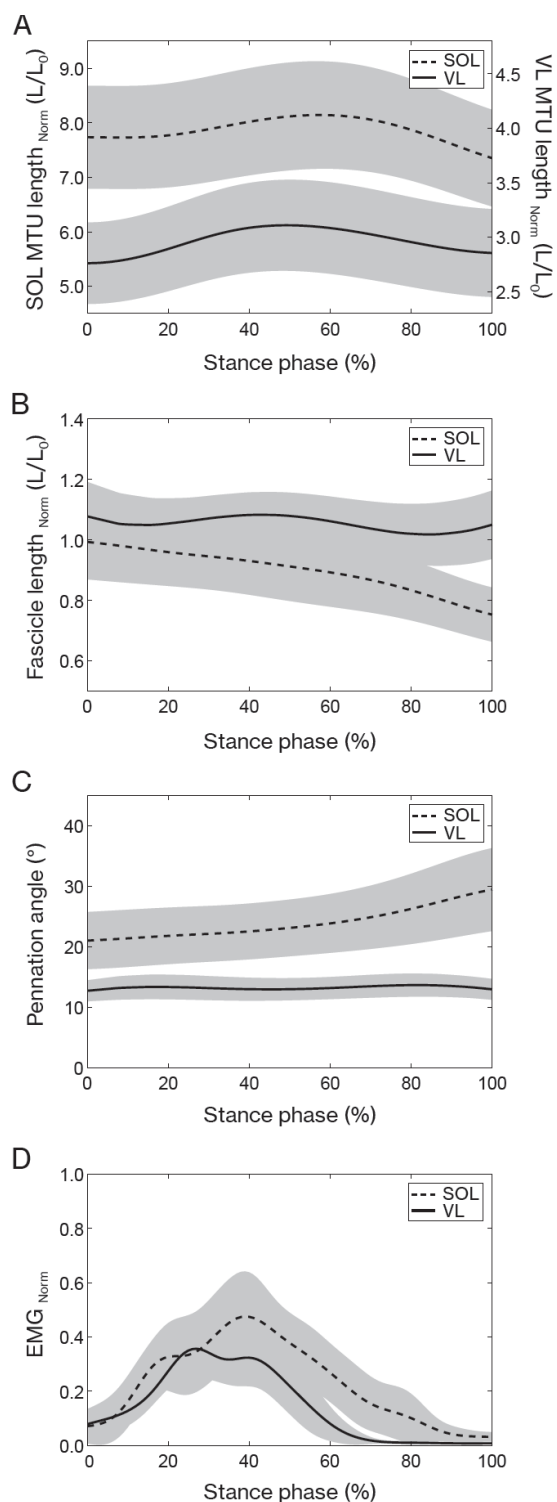

117

118 **Fig. 1:** Soleus (SOL, n = 19) and vastus lateralis (VL, n = 14) muscle-tendon unit (MTU) length (A) and muscle  
 119 fascicle length (normalized to optimal fascicle length L<sub>0</sub>, (B)), pennation angle (C) and electromyographic (EMG)  
 120 activity (normalized to a maximum voluntary isometric contraction, (D)) during the stance phase of running (mean  
 121 ± SD).

122

123 The stance phase-averaged force-length potential of both muscles was high and not significantly  
 124 different (p = 0.689, fig. 2). The average pennation angle of the soleus was significantly greater than  
 125 that of the VL (soleus 23.9 ± 5.1°, VL 13.3 ± 1.8°, p < 0.001) and increased continuously throughout  
 126 stance, whereas it remained almost unchanged in the VL (fig. 1). The average operating velocity of the

127 soleus fascicles was significantly higher compared to the VL (soleus  $0.799 \pm 0.260 L_0/s$ , VL  $0.084 \pm$   
128  $0.258 L_0/s$ ,  $p < 0.001$ ), which showed an almost isometric contraction throughout stance. Consequently,  
129 the force-velocity potential ( $p < 0.001$ ) and thus the overall force-length-velocity potential ( $p < 0.001$ ) of  
130 the soleus was significantly lower compared to the VL during the stance phase (fig. 2).  
131

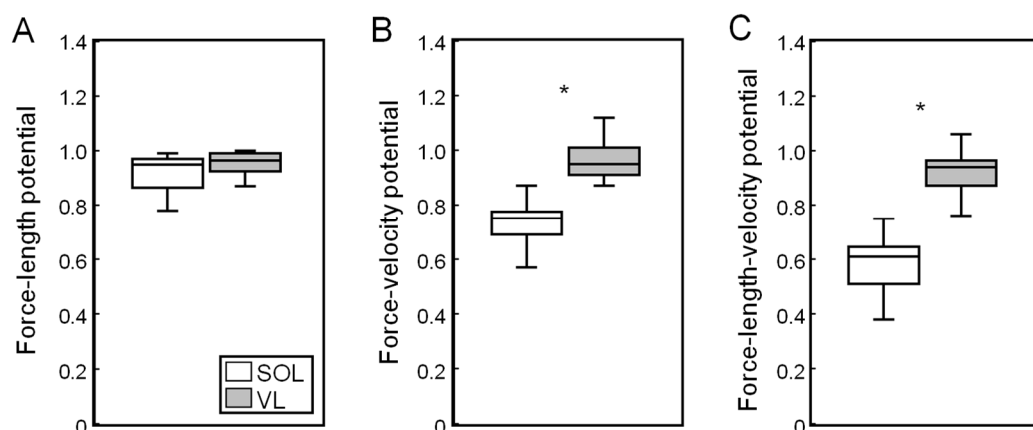

132  
133 **Fig. 2:** Soleus (SOL,  $n = 19$ ) and vastus lateralis (VL,  $n = 14$ ) force-length potential (A), force-velocity potential (B)  
134 and overall force-length-velocity potential (C) averaged over the stance phase of running. \* significant difference  
135 between muscles ( $p < 0.05$ ).

136  
137 However, the higher shortening velocity of the soleus was close to the optimum one for maximum  
138 enthalpy efficiency, leading to a significantly higher enthalpy efficiency over the stance phase in  
139 comparison to the VL ( $p < 0.001$ , fig. 3).

140

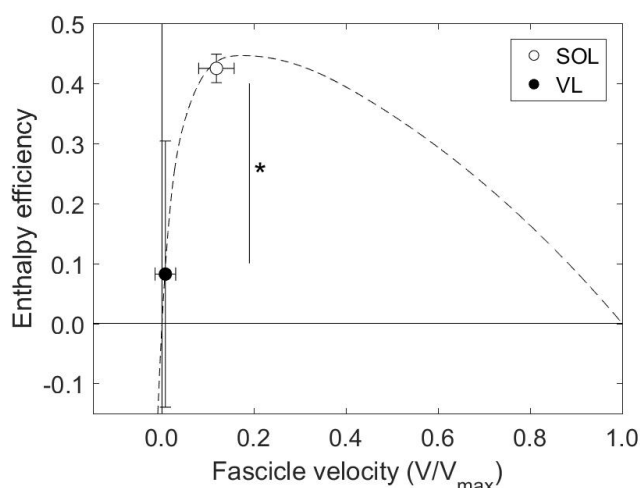

141  
142 **Fig. 3:** Soleus (SOL,  $n = 19$ ) and vastus lateralis (VL,  $n = 14$ ) enthalpy efficiency (mean  $\pm$  SD) averaged over the  
143 stance phase of running onto the enthalpy efficiency-fascicle velocity relationship (dashed line). \* significant  
144 difference between muscles ( $p < 0.05$ ).

145  
146 The fascicle, belly and MTU length changes throughout stance as well as the resulting velocity  
147 decoupling coefficients are illustrated in figure 4 for both muscles. There was a clear length- and velocity-  
148 decoupling of MTU and belly due to tendon compliance in both muscles (fig. 4). The SPM analysis

149 revealed a significantly lower  $DC_{Tendon}$  of the soleus compared to the VL between 4 and 8% of stance  
 150 phase ( $p = 0.032$ ), since decoupling started later for the soleus. Between 20 and 57% of stance phase  
 151 ( $p < 0.001$ ) and between 65% of stance phase until lift-off, the soleus  $DC_{Tendon}$  was significantly higher  
 152 than VL ( $p < 0.001$ , fig. 4). The  $DC_{Tendon}$  averaged over the stance phase of the soleus was also  
 153 significantly greater ( $p < 0.001$ , tab. 1). Furthermore, the velocity-decoupling of belly and fascicles due  
 154 to fascicle rotation progressively increased in the second part of the stance for the soleus but was  
 155 negligible for the VL (fig. 4). The soleus  $DC_{Belly}$  was significantly higher from 33% of stance phase until  
 156 lift-off compared to the VL as shown by the SPM analysis ( $p < 0.001$ , fig. 4) but also when averaged  
 157 over the entire stance phase ( $p < 0.001$ , tab. 1).  $DC_{Belly}$  was markedly lower than  $DC_{Tendon}$ , indicating  
 158 that the tendon covered the majority of the overall decoupling in both muscles (fig. 4). Accordingly and  
 159 similarly to  $DC_{Tendon}$ , the SPM analysis for the overall decoupling of MTU and fascicles showed that  
 160  $DC_{MTU}$  of the soleus was significantly lower between 4 and 8% of stance phase ( $p = 0.032$ ) and  
 161 significantly higher from 20 to 57% of stance phase and from 65% of stance phase until lift-off compared  
 162 to the VL ( $p < 0.001$ , fig. 4). The stance phase-averaged  $DC_{MTU}$  of the soleus was significantly greater  
 163 compared to the VL as well ( $p < 0.001$ , tab. 1).  
 164

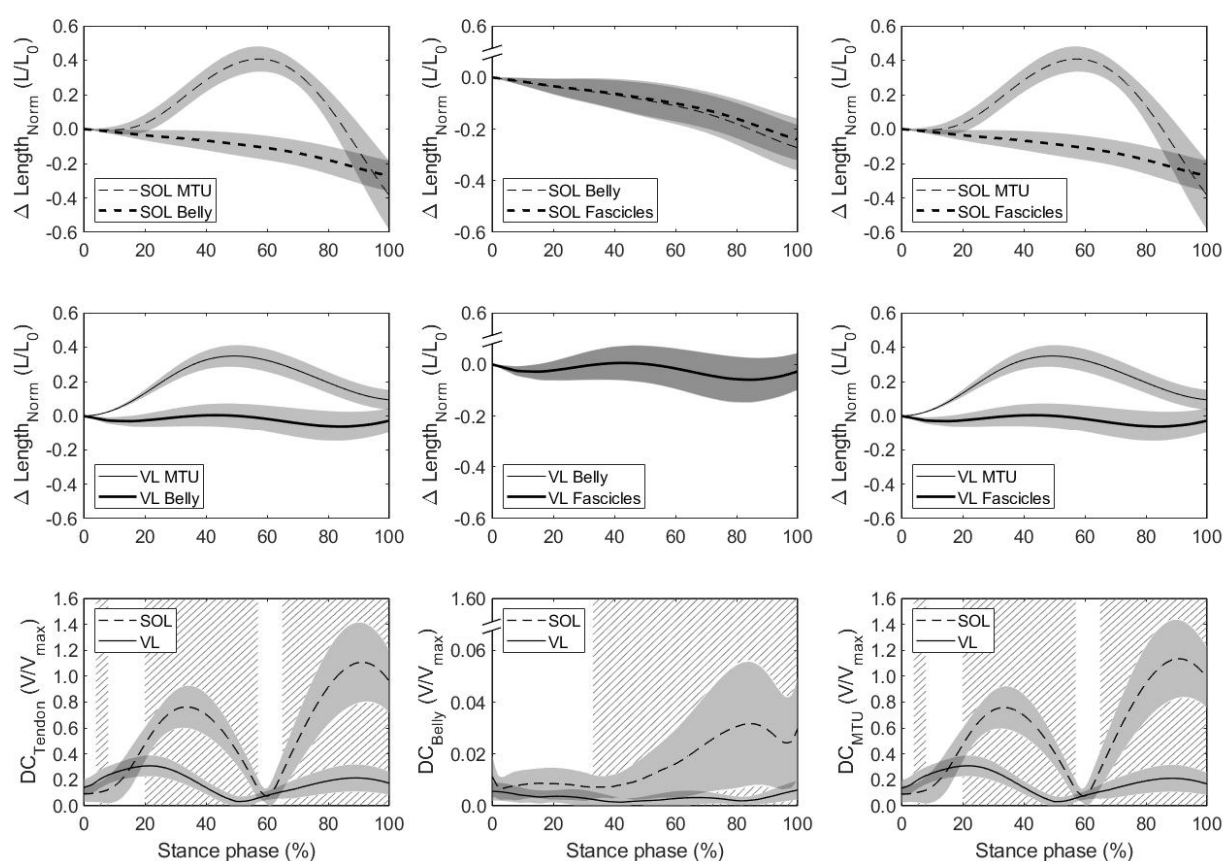

165  
 166  
 167 **Fig. 4:** Soleus (SOL,  $n = 19$ , top row) and vastus lateralis (VL,  $n = 14$ , mid row) MTU vs. belly length changes (left),  
 168 belly vs. fascicle length changes (mid) and MTU vs. fascicle length changes (right) over the stance phase of running  
 169 with respect to the length at touchdown (0% stance phase). Differences between trajectories illustrate the length-  
 170 decoupling due to tendon compliance, fascicle rotation and the overall decoupling, respectively. The bottom row  
 171 shows the corresponding resulting velocity-decoupling coefficients (DC) as the absolute velocity differences  
 172 between fascicles, belly and MTU normalized to the maximum shorting velocity (see methods). Intervals of stance  
 173 with a significant difference between both muscles are illustrated as hatched areas ( $p < 0.05$ ).

174 **Table 1:** Average tendon ( $DC_{Tendon}$ ), belly ( $DC_{Belly}$ ) and muscle-tendon unit ( $DC_{MTU}$ ) decoupling coefficients for the  
175 soleus and vastus lateralis (VL) muscles during the stance phase of running (mean  $\pm$  SD).

|                           | Soleus (n=19)     | VL (n=14)           |
|---------------------------|-------------------|---------------------|
| $DC_{Tendon} (V/V_{max})$ | $0.567 \pm 0.128$ | $0.180 \pm 0.053^*$ |
| $DC_{Belly} (V/V_{max})$  | $0.016 \pm 0.008$ | $0.003 \pm 0.002^*$ |
| $DC_{MTU} (V/V_{max})$    | $0.574 \pm 0.127$ | $0.179 \pm 0.014^*$ |

\* Statistically significant difference between the two muscles ( $p < 0.05$ )

176  
177

178

179

## 180 Discussion

181 We mapped the operating length and velocity of the soleus and the VL fascicles during running onto the  
182 individual force-length, force-velocity and enthalpy efficiency-velocity curves in order to investigate  
183 physiological mechanisms for muscle force generation and muscle energy production in the two  
184 muscles. The soleus continuously shortened throughout the stance phase and produced muscular work  
185 at a shortening velocity close to the enthalpy efficiency optimum. VL operated with smaller length  
186 changes, almost isometrically, resulting in a high force-velocity potential beneficial for economic force  
187 generation. Both muscles operated close to  $L_0$ , i.e. at a high force-length potential. Tendon compliance  
188 covered the majority of the overall decoupling of MTU and fascicles in both muscles, enabling favorable  
189 conditions for muscle force or muscle work production. Only in the soleus muscle, fascicle rotation  
190 contributed to the overall decoupling, indicating an additional, yet comparatively minor, effect on the  
191 fascicle dynamics during locomotion.

192 The triceps surae and quadriceps muscle groups are the main actuators for locomotion and thus  
193 responsible for a great portion of the metabolic energy cost of running [18,36,38,39]. While the  
194 quadriceps mainly decelerates and supports body mass in the early stance phase, the triceps surae  
195 contributes to the acceleration of the center of mass during the second part of the stance phase [18,20].  
196 The soleus is the largest muscle of the triceps surae [12] and the VL of the quadriceps [15] and thus  
197 both muscles are important contributors to the running movement. We found that the soleus actively  
198 shortened throughout the entire stance phase, indicating continuous work/energy production. The  
199 average velocity at which the soleus shortened was very close to the optimal velocity for maximal  
200 enthalpy efficiency. Enthalpy efficiency quantifies the fraction of chemical energy from ATP hydrolysis  
201 that is converted into mechanical muscular work [26,27] with a peak at around 20% of  $V_{max}$  [27,29].  
202 Consequently, the mechanical work performed by the soleus muscle, being essential during running  
203 [18,40–42] and high enough in magnitude to significantly influence the overall metabolic energy cost of  
204 locomotion [13,43,44], was generated at a high enthalpy efficiency (94% of maximum efficiency).  
205 Considering that also the soleus force-length potential was close to the maximum (0.92) and that a high  
206 potential may decrease the active muscle volume for a given muscle force [9,10,43], our results provide  
207 evidence of a cumulative contribution of two different mechanisms (high force-length potential and high  
208 enthalpy efficiency) to an advantageous muscular energy production of the soleus during running. The  
209 VL was mainly active in the first part of the stance phase and its fascicles operated with very small length

210 changes, i.e. almost isometrically, confirming earlier reports [16,17]. This indicates that the VL dissipates  
211 and/or produces negligible amounts of mechanical energy during running, yet generating force for the  
212 deceleration and support of the body mass. The found decoupling of the VL MTU and fascicles showed  
213 that the deceleration of the body mass in the early stance phase was not a result of an energy dissipation  
214 by the contractile element (active stretch) but rather an energy absorption by the tendinous tissue.  
215 Tendons feature small damping characteristics resulting in a hysteresis of only 10% [45,46] and,  
216 therefore, the main part of the absorbed energy of the body's deceleration is stored as elastic tendon  
217 strain energy, which is then returned later in the second part of the stance phase. The high force-length  
218 (0.93) and force-velocity (0.90) potential of the VL muscle throughout stance indicates an energy  
219 exchange within the VL MTU under almost optimal conditions for muscle force generation during  
220 running. Operating at high potentials reduces the active muscle volume for a given force [9,10] and thus  
221 the metabolic energy cost of muscle force generation.

222 By actively shortening, the soleus delivered energy during the entire stance phase to the skeleton,  
223 providing the main muscular work required for running. On the other side, the contractile elements of  
224 the VL muscle did not contribute to the required muscular work and operated in concert with the elastic  
225 tendon in favor of energy storage [4]. Our findings showed that, although the human body interacts with  
226 the ground in a spring-like manner during steady-state running to conserve mechanical energy [3,4],  
227 there are indeed muscles that operate as energy generators, like the soleus, and others that promote  
228 energy conservations, like the VL. Further, our results indicate that the fascicle operating length and  
229 velocity of the soleus muscle, the main energy generator, is optimized for high enthalpy efficiency, while  
230 those of the VL muscle, that promote energy conservation, for a high potential of force generation. The  
231 consequence of the active shortening of the soleus muscle for work production is a decrease of the  
232 force-velocity potential during the stance phase, which may increase the active muscle volume and  
233 shortening-related cost [6–8]. However, the soleus muscle features shorter fascicles ( $L_0 = 41$  mm)  
234 compared to the VL muscle ( $L_0 = 94$  mm) and, for this reason, a given force generated by the soleus is  
235 energetically less expensive [10]. The specific morphology of the soleus muscle certainly compensates  
236 for the reductions of the force-velocity potential and provides advantages for its function as energy  
237 generator during submaximal steady-state running. Furthermore, operating around the “sweet spot” of  
238 the shortening velocity for high enthalpy efficiency facilitates the economical muscular work production,  
239 while either a too high or a too low shortening velocity would be disadvantageous.

240 The almost optimal conditions for muscular work production and muscle force generation of the soleus  
241 and VL were a result of an effective decoupling between MTU and fascicle length that was regulated by  
242 an appropriate muscle activation. For the soleus, the activation level increased in the first part of stance  
243 phase, contracting the muscle while the MTU increased in length. This activation pattern not only  
244 prevented the muscle to be stretched but also induced continuous shortening around the plateau of the  
245 force-length curve at a high enthalpy efficiency. The respective high  $DC_{\text{Tendon}}$  further indicates that a part  
246 of the body's mechanical energy was stored as strain energy in the Achilles tendon in addition to the  
247 generated work by fascicle shortening. During MTU shortening (propulsion phase), the soleus EMG  
248 activation decreased and the tendon recoiled, enabling the high shortening velocities of the MTU while  
249 maintaining the fascicle operating conditions close to the efficiency optimum. The simultaneous release  
250 of the stored strain energy from the tendon further added to the ongoing muscle work production, i.e.



251 energy amplification. The VL muscle showed higher levels of activation during the initial part of the  
252 stance phase and earlier deactivation than soleus. The timing and level of activation regulated the  
253 decoupling within the VL MTU during the body mass deceleration in a magnitude that the lengthening  
254 and shorting of the MTU was fully accomplished by the tendinous tissue. Consequently, the VL fascicles  
255 operated at a high force-length-velocity potential and the body's energy was conserved within the MTU.  
256 Although being substantial for soleus and VL, the SPM analysis revealed higher values of  $DC_{Tendon}$  for  
257 soleus during the major part of the stance phase (average value for soleus  $0.57 V/V_{max}$  and VL  $0.18$   
258  $V/V_{max}$ ), indicating a greater decoupling within the soleus MTU compared to the VL MTU. In the soleus  
259 muscle, fascicle rotation (changes in pennation angle) had an additional effect on the overall decoupling  
260 between MTU and fascicles. The results showed an increase in  $DC_{Belly}$  in the second part of the stance  
261 phase where the soleus belly velocity was high during the MTU shortening. However, the decoupling by  
262 the fascicle rotation was considerable smaller compared to the tendon decoupling. Over the stance  
263 phase, belly and tendon decoupling were  $1.6 \%V_{max}$  and  $57 \%V_{max}$  and during the MTU shortening phase  
264  $2.6 \%V_{max}$  and  $72 \%V_{max}$  respectively, suggesting a rather minor functional role of fascicle rotation during  
265 submaximal running. In the VL, fascicle rotation was virtually absent and consequently  $DC_{Belly}$  values  
266 showed no relevant decoupling effect at all.

267

268 In conclusion, our results showed that during the stance phase of steady-state running, when the human  
269 body interacts with the environment in a spring-like manner, the soleus muscle acts as energy generator  
270 and the VL muscle as energy conservator. Furthermore, our findings provide evidence that the soleus  
271 operates under conditions optimal for muscular energy production (i.e. high force-length potential and  
272 high enthalpy efficiency) and the VL under conditions optimal for muscle force generation (i.e. high force-  
273 length and high force-velocity potential).

274

275

## 276 **Materials and methods**

### 277 **Participants and experimental design**

278 Thirty-three physically active adults were included in the present investigation. None of the participants  
279 reported any history of neuromuscular or skeletal impairments in the six months prior to the recordings.  
280 The ethics committee of the university approved the study (EA2/076/15) and the participants gave  
281 written informed consent in accordance with the Declaration of Helsinki. From the right leg, either the  
282 soleus ( $n = 19$ ,  $29 \pm 6$  yrs.,  $177 \pm 9$  cm,  $69 \pm 9$  kg, 7 females) or vastus lateralis ( $n = 14$ , age  $28 \pm 4$  yrs.,  
283 height  $179 \pm 7$  cm, body mass  $75 \pm 8$  kg, 3 females) muscle fascicle length, fascicle pennation angle  
284 and EMG activity were recorded during running on a treadmill at 2.5 m/s. Corresponding MTU lengths  
285 were calculated from the kinematic data and individually measured tendon lever arms. We further  
286 assessed the soleus and VL force-fascicle length and force-fascicle velocity relationship to calculate the  
287 force-length and force-velocity potential of the soleus and the VL muscle fascicles during running. The  
288 operating fascicle velocity was additionally mapped on the enthalpy efficiency-velocity relationship to  
289 assess the enthalpy efficiency of both muscles. The contribution of the decoupling of the fascicle length

290 and velocity from the MTU to the operating force potential and enthalpy efficiency at the level of tendon  
291 and muscle belly during running was examined for both muscles as well.

292

### 293 **Joint kinematics, fascicle behavior and electromyographic activity during running**

294 After a familiarization phase, a four-minute running trial on a treadmill (soleus: h/p cosmos mercury,  
295 Isny, Germany; VL: Daum electronic, ergo\_run premium8, Fürth, Germany) was performed and  
296 kinematics of the right leg were captured by a Vicon motion capture system (version 1.8, Vicon Motion  
297 Systems, Oxford, UK, 250 Hz) using an anatomically-referenced reflective marker setup (greater  
298 trochanter, lateral femoral epicondyle and malleolus, fifth metatarsal and tuber calcanei). The kinematic  
299 data were used to determine the touchdown of the foot and the toe-off as consecutive minima in knee  
300 joint angle over time [47]. Furthermore, the kinematics of the ankle and knee joint served to calculate  
301 the MTU length change of the soleus and VL during running, as the product of ankle joint angle changes  
302 and Achilles tendon lever arm as well as knee joint angle changes and patellar tendon lever arm [48],  
303 respectively. We used the ultrasound-based tendon-excursion method for the Achilles tendon lever arm  
304 determination [49]. The patellar tendon lever arm was measured using magnetic resonance imaging in  
305 fully extended knee joint position and calculated as a function of the knee joint angle change using the  
306 data by Herzog & Read [50] (for a detailed description of both tendon lever arm measurements see  
307 [13,14,16]). The initial soleus and VL MTU length was calculated based on the regression equation  
308 provided by Hawkins & Hull [51] at neutral ankle joint angle for the soleus MTU and at touchdown for  
309 the VL MTU. During the running trial, ultrasound images of either the soleus or VL muscle fascicles were  
310 recorded synchronously to the kinematic data (soleus: Aloka Prosound Alpha 7, Hitachi, Tokyo, Japan,  
311 6 cm linear array probe, UST-5713T, 13.3 MHz, 146 Hz; VL: My Lab60, Esaote, Genova, Italy, 10 cm  
312 linear array probe LA923, 10 MHz, 43 Hz). The ultrasound probe was mounted over the medial aspect  
313 of the soleus muscle belly or on the VL muscle belly ( $\approx 50\%$  of femur length) using a custom anti-skid  
314 neoprene-plastic cast. The fascicle length was post-processed from the ultrasound images using a self-  
315 developed semi-automatic tracking algorithm [23] that calculated a representative reference fascicle on  
316 the basis of multiple muscle fascicle portions identified from the entire displayed muscle (for details see  
317 [16,23], fig. 5). Visual inspection of each image was conducted and corrections were made if necessary.  
318 At least nine steps were analyzed for each participant and then averaged [16,52]. The pennation angle  
319 was calculated as the angle between the deeper aponeurosis and the reference fascicle (fig. 5). The  
320 length changes of the muscle belly of soleus and VL were calculated as the differences of consecutive  
321 products of fascicle length and the respective cosine of the pennation angle [53]. Note that this does not  
322 give the length of the entire soleus or VL muscle belly but rather the projection of the instant fascicle  
323 length onto the plane of the MTU, which can be used to calculate the changes of the belly length [13].  
324 The velocities of fascicles, belly and MTU were calculated as the first derivative of the lengths over time.  
325 Surface EMG of the VL and the soleus was measured by means of a wireless EMG system (Myon  
326 m320RX, Myon AG, Baar, Switzerland, 1000 Hz). A fourth-order high-pass Butterworth filter with 50 Hz  
327 cut-off frequency, a full-wave rectification and then a low-pass filter with 20 Hz cut-off frequency were  
328 applied to the raw EMG data. The EMG activity was averaged over the same steps that were analyzed  
329 for the soleus parameters and for the VL over 10 running steps. EMG values were then normalized for  
330 each participant to the maximum obtained during the individual MVCs.

### 331 **Assessment of the force-length, force-velocity and enthalpy efficiency-velocity relationship**

332 To determine the soleus and the VL force-length relationship, eight maximum voluntary plantar flexion  
333 or knee extension contractions (MVCs) in different joint angles were performed with the right leg on an  
334 isokinetic dynamometer (Biodex Medical, Syst. 3, Inc., Shirley, NY), following a standardized warm-up  
335 [13,16,25] (fig. 5). For the plantar flexion MVCs, the participants were placed in prone position with the  
336 knee in fixed flexed position ( $\sim 120^\circ$ ) to restrict the contribution of the bi-articular m. gastrocnemius to  
337 the plantar flexion moment [54] and the joint angles were set in a randomized equally-distributed order  
338 ranging from  $10^\circ$  plantar flexion to the individual maximum dorsiflexion angle. Regarding the knee  
339 extensions, participants were seated with a hip joint angle of  $85^\circ$  to reduce the contribution of the bi-  
340 articular m. rectus femoris [55], while the knee joint angle ranged between  $20^\circ$  to  $90^\circ$  knee joint angle  
341 ( $0^\circ$  = knee extended) in randomly ordered  $10^\circ$  intervals. The resultant moments at the ankle and knee  
342 joint were calculated under consideration of the effects of gravitational and passive moments and any  
343 misalignment between joint axis and dynamometer axis using an established inverse dynamics  
344 approach [56,57]. The required kinematic data were recorded during the MVCs based on anatomically  
345 referenced reflective markers (medial and lateral malleoli and epicondyle, calcaneal tuberosity, second  
346 metatarsal and greater trochanter) by a Vicon motion capture system (250 Hz). Furthermore, the  
347 contribution of the antagonistic moment produced by tibialis anterior during the plantar flexion MVCs or  
348 by the hamstring muscles during the knee extension MVCs was taken into account by means of an  
349 EMG-based method according to Mademli et al. [58]. The force applied to the Achilles tendon or patellar  
350 tendon during the plantar flexion or knee extension MVCs was calculated as quotient of the joint moment  
351 and individual tendon lever arm, respectively. The soleus or the VL fascicle behavior during the MVCs  
352 was synchronously captured by ultrasonography and fascicle length was determined using the same  
353 methodology described above (fig. 5). Accordingly, an individual force-fascicle length relationship was  
354 calculated for soleus or VL by means of a second-order polynomial fit and the maximum muscle force  
355 applied to the tendon ( $F_{\max}$ ) and optimal fascicle length for force generation ( $L_0$ ) was derived,  
356 respectively (fig. 5).

357 The force-velocity relationship of the soleus and the VL muscle was further assessed using the classical  
358 Hill equation [8] and the muscle-specific  $V_{\max}$  and constants of  $a_{\text{rel}}$  and  $b_{\text{rel}}$ . For  $V_{\max}$  we took values of  
359 human soleus and VL type 1 and 2 fibers measured in vitro at  $15^\circ\text{C}$  reported by Luden et al. [59]. The  
360 values were then adjusted [60] for physiological temperature conditions ( $37^\circ\text{C}$ ) and an average fiber  
361 type distribution of the human soleus (type 1 fibers: 81%, type 2: 19%) and VL muscle (type 1 fibers:  
362 37%, type 2: 63%) reported in literature [59,61–63] was the basis to derive a representative value of  
363  $V_{\max}$ . For the soleus muscle under the in vivo condition,  $V_{\max}$  was calculated as  $6.77 L_0/s$  and for the VL  
364 as  $11.51 L_0/s$ . For  $L_0$  we then referred to the individually measured optimal fascicle length (described  
365 above, fig. 5). The constant  $a_{\text{rel}}$  was calculated as  $0.1+0.4\text{FT}$ , where FT is the fast twitch fiber type  
366 percentage, which then equals to 0.175 for the soleus and 0.351 for the VL [64,65]. The product of  $a_{\text{rel}}$   
367 and  $V_{\max}$  gives the constant  $b_{\text{rel}}$  as 1.182 for the soleus and 4.042 for the VL [66]. Based on the assessed  
368 force-length and force-velocity relationships, we calculated the individual force-length and force-velocity  
369 potential of both muscles as a function of the fascicle operating length and velocity during the stance  
370 phase of running. The product of both potentials then gives the overall force-length-velocity potential.

371

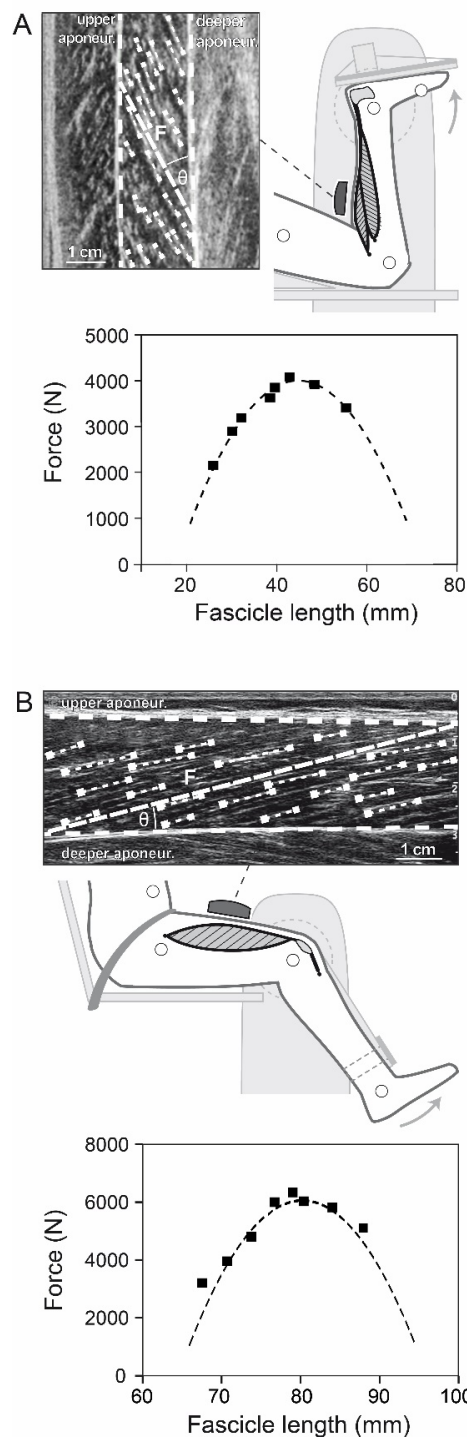

372

373 **Fig. 5.** Experimental setup for the determination of the soleus (A) and vastus lateralis (VL, B) force-fascicle length  
374 relationship. Maximum isometric plantar flexions (MVC) at eight different joint angles was performed on a  
375 dynamometer. During the MVCs, ultrasound images of the soleus and VL were recorded and a representative  
376 muscle fascicle length ( $F$ ) was calculated based on multiple fascicle portions (short dashed lines). Accordingly, an  
377 individual force-fascicle length relationship for the soleus and VL muscle was derived from the MVCs (squares) by  
378 means of a second-order polynomial fit (dashed line, bottom graphs).

379

380

381 Furthermore, we determined the enthalpy efficiency-velocity relationship for the soleus and the VL  
382 muscle fascicles in order to calculate the enthalpy efficiency of both muscles as a function of the fascicle  
383 operating velocity during running. For this purpose, we used the experimental efficiency values provided  
384 by the paper of Hill 1964 in table 1 for  $a/P_0 = 0.25$  [27]. Because the effect of differences in  $a/P_0$  on the

385 shape of the curve is negligible [27], we used the same values for both muscles. By means of the  
386 classical Hill equation [8], we then transposed the original efficiency values that were presented as a  
387 function of relative load (relative to maximum tension) to shortening velocity (normalized to  $V_{max}$ ). The  
388 values of enthalpy efficiency and shortening velocity were then fitted using a cubic spline, giving the  
389 right-skewed parabolic-shaped curve with a peak efficiency of 0.45 at a velocity of 0.18  $V/V_{max}$ . The  
390 resulting function was then used to calculate the enthalpy efficiency of the soleus and the VL during  
391 running based on the average value of the fascicle velocity over stance, accordingly.

392

### 393 **Assessment of decoupling within the muscle-tendon unit**

394 To quantify the decoupling of fascicle, belly and MTU velocities over the time course of stance we  
395 calculated a decoupling coefficient to account for the tendon compliance ( $DC_{Tendon}$ , equation 1), fascicle  
396 rotation ( $DC_{Belly}$ , equation 2) as well as for the overall decoupling of MTU and fascicle velocities that  
397 includes both components ( $DC_{MTU}$ , equation 3).

398

$$399 \quad DC_{Tendon}(t) = |V_{MTU}(t) - V_{Belly}(t)|/V_{max} \quad (1)$$

400

$$401 \quad DC_{Belly}(t) = |V_{Belly}(t) - V_{Fascicle}(t)|/V_{max} \quad (2)$$

402

$$403 \quad DC_{MTU}(t) = |V_{MTU}(t) - V_{Fascicle}(t)|/V_{max} \quad (3)$$

404

405  $V(t)$  is the velocity at each percentage of the stance phase (i.e.  $t = 0, 1, \dots, 100$  %stance). We introduced  
406 these new decoupling coefficients because previously suggested decoupling ratios (i.e. tendon gearing  
407 =  $V_{MTU}/V_{Belly}$ , belly gearing (or architectural gear ratio) =  $V_{Belly}/V_{Fascicle}$ , MTU gearing =  $V_{MTU}/V_{Fascicle}$   
408 [30,31]) may feature limitations for the application under in vivo conditions, i.e. considering that muscle  
409 belly and fascicle velocities may be very close to or even zero during functional tasks as walking and  
410 running [13,16], which results in non-physiological gear ratios.

411

### 412 **Statistics**

413 A t-test for independent samples was used to test for group differences in anthropometric characteristics,  
414 temporal gait parameters and differences between the soleus and the VL fascicle belly, MTU and EMG  
415 parameters. The Mann-Whitney U test was applied in case the assumption of normal distribution, tested  
416 by the Kolmogorov-Smirnov test with Lilliefors correction, was not satisfied. The level of significance  
417 was set to  $\alpha = 0.05$  and the statistical analyses were performed using SPSS (IBM Corp., version 22,  
418 NY, US). Furthermore, statistical parametric mapping (SPM, independent sample t-test,  $\alpha = 0.05$ ) was  
419 used to test for differences between the  $DC_{Tendon}$ ,  $DC_{Belly}$  and  $DC_{MTU}$  of the soleus and the VL throughout  
420 the stance phase of running. SPM was conducted using the software package spm1D (version 0.4,  
421 [www.spm1d.org](http://www.spm1d.org)) [67].

422

423

424

425 **Authors' contributions**

426 S.B., F.M., A.S., A.S. and A.A. designed research. S.B., F.M. and A.S. performed research. S.B.  
427 analysed data. S.B. and A.A. drafted the manuscript. F.M., A.S. and A.S. made important intellectual  
428 contributions during revision.

429

430 **Competing interests**

431 We declare we have no competing interests.

432

433 **Funding**

434 Funding for this research was supplied by the German Federal Institute of Sport Science (grant no.  
435 ZMVI14-070604/17-18). The magnetic resonance image acquisition was funded by the foundation  
436 Stiftung Oskar-Helene-Heim.

437

438

439

440 **References**

- 441 1. Kram R, Taylor CR. 1990 Energetics of running: a new perspective. *Nature* **346**, 265–267.  
442 (doi:10.1038/346265a0)
- 443 2. Kram R. 2000 Muscular force or work: what determines the metabolic energy cost of running?  
444 *Exerc. Sport Sci. Rev.* **28**, 138–143.
- 445 3. Dickinson MH, Farley CT, Full RJ, Koehl M a. R, Kram R, Lehman S. 2000 How Animals Move:  
446 An Integrative View. *Science* **288**, 100–106. (doi:10.1126/science.288.5463.100)
- 447 4. Roberts TJ, Azizi E. 2011 Flexible mechanisms: the diverse roles of biological springs in  
448 vertebrate movement. *J. Exp. Biol.* **214**, 353–361. (doi:10.1242/jeb.038588)
- 449 5. Cavagna GA, Saibene FP, Margaria R. 1964 Mechanical work in running. *J. Appl. Physiol.* **19**,  
450 249–256. (doi:10.1152/jappl.1964.19.2.249)
- 451 6. Fenn WO. 1924 The relation between the work performed and the energy liberated in muscular  
452 contraction. *J. Physiol.* **58**, 373–395. (doi:10.1113/jphysiol.1924.sp002141)
- 453 7. Smith NP, Barclay CJ, Loiselle DS. 2005 The efficiency of muscle contraction. *Prog. Biophys. Mol.*  
454 *Biol.* **88**, 1–58. (doi:10.1016/j.pbiomolbio.2003.11.014)
- 455 8. Hill Archibald Vivian. 1938 The heat of shortening and the dynamic constants of muscle. *Proc. R.*  
456 *Soc. Lond. Ser. B - Biol. Sci.* **126**, 136–195. (doi:10.1098/rspb.1938.0050)
- 457 9. Fletcher JR, MacIntosh BR. 2017 Running Economy from a Muscle Energetics Perspective. *Front.*  
458 *Physiol.* **8**, 433. (doi:10.3389/fphys.2017.00433)
- 459 10. Biewener AA, Roberts TJ. 2000 Muscle and Tendon Contributions to Force, Work, and Elastic  
460 Energy Savings: A Comparative Perspective. *Exerc. Sport Sci. Rev.* **28**, 99.
- 461 11. Lai A, Schache AG, Lin Y-C, Pandy MG. 2014 Tendon elastic strain energy in the human ankle  
462 plantar-flexors and its role with increased running speed. *J. Exp. Biol.* **217**, 3159–3168.  
463 (doi:10.1242/jeb.100826)

- 464 12. Albracht K, Arampatzis A, Baltzopoulos V. 2008 Assessment of muscle volume and physiological  
465 cross-sectional area of the human triceps surae muscle in vivo. *J. Biomech.* **41**, 2211–2218.  
466 (doi:10.1016/j.jbiomech.2008.04.020)
- 467 13. Bohm S, Mersmann F, Santuz A, Arampatzis A. 2019 The force–length–velocity potential of the  
468 human soleus muscle is related to the energetic cost of running. *Proc. R. Soc. B Biol. Sci.* **286**,  
469 20192560. (doi:10.1098/rspb.2019.2560)
- 470 14. Bohm S, Mersmann F, Santuz A, Arampatzis A. 2021 Enthalpy efficiency of the soleus muscle  
471 contributes to improvements in running economy. *Proc. R. Soc. B Biol. Sci.* **288**, 20202784.  
472 (doi:10.1098/rspb.2020.2784)
- 473 15. Mersmann F, Bohm S, Schroll A, Boeth H, Duda G, Arampatzis A. 2015 Muscle shape  
474 consistency and muscle volume prediction of thigh muscles. *Scand. J. Med. Sci. Sports* **25**, e208–  
475 e213. (doi:10.1111/sms.12285)
- 476 16. Bohm S, Marzilger R, Mersmann F, Santuz A, Arampatzis A. 2018 Operating length and velocity  
477 of human vastus lateralis muscle during walking and running. *Sci. Rep.* **8**, 5066.  
478 (doi:10.1038/s41598-018-23376-5)
- 479 17. Monte A, Baltzopoulos V, Maganaris CN, Zamparo P. In press. Gastrocnemius Medialis and  
480 Vastus Lateralis in vivo muscle-tendon behavior during running at increasing speeds. *Scand. J.*  
481 *Med. Sci. Sports* **n/a**. (doi:10.1111/sms.13662)
- 482 18. Hamner SR, Delp SL. 2013 Muscle contributions to fore-aft and vertical body mass center  
483 accelerations over a range of running speeds. *J. Biomech.* **46**, 780–787.  
484 (doi:10.1016/j.jbiomech.2012.11.024)
- 485 19. Arampatzis A, De Monte G, Karamanidis K, Morey-Klapsing G, Stafilidis S, Brueggemann G-P.  
486 2006 Influence of the muscle-tendon unit's mechanical and morphological properties on running  
487 economy. *J. Exp. Biol.* **209**, 3345–3357. (doi:10.1242/jeb.02340)
- 488 20. Dorn TW, Schache AG, Pandy MG. 2012 Muscular strategy shift in human running: dependence  
489 of running speed on hip and ankle muscle performance. *J. Exp. Biol.* **215**, 1944–1956.  
490 (doi:10.1242/jeb.064527)
- 491 21. Santuz A, Ekizos A, Kunimasa Y, Kijima K, Ishikawa M, Arampatzis A. 2020 Lower complexity of  
492 motor primitives ensures robust control of high-speed human locomotion. *Heliyon* **6**.  
493 (doi:10.1016/j.heliyon.2020.e05377)
- 494 22. Maganaris CN, Baltzopoulos V, Sargeant AJ. 1998 In vivo measurements of the triceps surae  
495 complex architecture in man: implications for muscle function. *J. Physiol.* **512**, 603–614.  
496 (doi:10.1111/j.1469-7793.1998.603be.x)
- 497 23. Marzilger R, Legerlotz K, Panteli C, Bohm S, Arampatzis A. 2018 Reliability of a semi-automated  
498 algorithm for the vastus lateralis muscle architecture measurement based on ultrasound images.  
499 *Eur. J. Appl. Physiol.* **118**, 291–301. (doi:10.1007/s00421-017-3769-8)
- 500 24. Gordon AM, Huxley AF, Julian FJ. 1966 The variation in isometric tension with sarcomere length  
501 in vertebrate muscle fibres. *J. Physiol.* **184**, 170–192.
- 502 25. Nikolaidou ME, Marzilger R, Bohm S, Mersmann F, Arampatzis A. 2017 Operating length and  
503 velocity of human M. vastus lateralis fascicles during vertical jumping. *R. Soc. Open Sci.* **4**,  
504 170185. (doi:10.1098/rsos.170185)
- 505 26. Barclay CJ. 2015 Energetics of contraction. *Compr. Physiol.* **5**, 961–995.  
506 (doi:10.1002/cphy.c140038)
- 507 27. Hill AV. 1964 The efficiency of mechanical power development during muscular shortening and its  
508 relation to load. *Proc. R. Soc. Lond. B Biol. Sci.* **159**, 319–324. (doi:10.1098/rspb.1964.0005)

- 509 28. Hill AV. 1939 The mechanical efficiency of frog's muscle. *Proc. R. Soc. Lond. Ser. B - Biol. Sci.*  
510 **127**, 434–451. (doi:10.1098/rspb.1939.0033)
- 511 29. Barclay CJ, Constable JK, Gibbs CL. 1993 Energetics of fast- and slow-twitch muscles of the  
512 mouse. *J. Physiol.* **472**, 61–80. (doi:10.1113/jphysiol.1993.sp019937)
- 513 30. Wakeling JM, Blake OM, Wong I, Rana M, Lee SSM. 2011 Movement mechanics as a  
514 determinate of muscle structure, recruitment and coordination. *Philos. Trans. R. Soc. Lond. B Biol.*  
515 *Sci.* **366**, 1554–1564. (doi:10.1098/rstb.2010.0294)
- 516 31. Azizi E, Brainerd EL, Roberts TJ. 2008 Variable gearing in pennate muscles. *Proc. Natl. Acad.*  
517 *Sci. U. S. A.* **105**, 1745–1750. (doi:10.1073/pnas.0709212105)
- 518 32. Alexander R. 1991 Energy-Saving Mechanisms in Walking and Running. *J. Exp. Biol.* **160**, 55–69.
- 519 33. Zuurbier CJ, Huijing PA. 1992 Influence of muscle geometry on shortening speed of fibre,  
520 aponeurosis and muscle. *J. Biomech.* **25**, 1017–1026. (doi:10.1016/0021-9290(92)90037-2)
- 521 34. Werkhausen A, Cronin NJ, Albracht K, Paulsen G, Larsen AV, Bojsen-Møller J, Seynnes OR.  
522 2019 Training-induced increase in Achilles tendon stiffness affects tendon strain pattern during  
523 running. *PeerJ* **7**. (doi:10.7717/peerj.6764)
- 524 35. Biewener AA. 2016 Locomotion as an emergent property of muscle contractile dynamics. *J. Exp.*  
525 *Biol.* **219**, 285–294. (doi:10.1242/jeb.123935)
- 526 36. Farris DJ, Sawicki GS. 2012 The mechanics and energetics of human walking and running: a joint  
527 level perspective. *J. R. Soc. Interface* **9**, 110–118. (doi:10.1098/rsif.2011.0182)
- 528 37. Biewener AA, Daley MA. 2007 Unsteady locomotion: integrating muscle function with whole body  
529 dynamics and neuromuscular control. *J. Exp. Biol.* **210**, 2949–2960. (doi:10.1242/jeb.005801)
- 530 38. Fletcher JR, MacIntosh BR. 2015 Achilles tendon strain energy in distance running: consider the  
531 muscle energy cost. *J. Appl. Physiol.* **118**, 193–199. (doi:10.1152/jappphysiol.00732.2014)
- 532 39. Uchida TK, Hicks JL, Dembia CL, Delp SL. 2016 Stretching Your Energetic Budget: How Tendon  
533 Compliance Affects the Metabolic Cost of Running. *PLoS One* **11**, e0150378.  
534 (doi:10.1371/journal.pone.0150378)
- 535 40. Lai A, Lichtwark GA, Schache AG, Lin Y-C, Brown NAT, Pandy MG. 2015 In vivo behavior of the  
536 human soleus muscle with increasing walking and running speeds. *J. Appl. Physiol. Bethesda Md*  
537 **1985** **118**, 1266–1275. (doi:10.1152/jappphysiol.00128.2015)
- 538 41. Stefanyshyn DJ, Nigg BM. 1998 Contribution of the lower extremity joints to mechanical energy in  
539 running vertical jumps and running long jumps. *J. Sports Sci.* **16**, 177–186.  
540 (doi:10.1080/026404198366885)
- 541 42. Arampatzis A, Bruggemann GP, Metzler V. 1999 The effect of speed on leg stiffness and joint  
542 kinetics in human running. *J. Biomech.* **32**, 1349–1353. (doi:10.1016/S0021-9290(99)00133-5)
- 543 43. Beck ON, Punith LK, Nuckols RW, Sawicki GS. 2019 Exoskeletons Improve Locomotion Economy  
544 by Reducing Active Muscle Volume. *Exerc. Sport Sci. Rev.* **47**, 237–245.  
545 (doi:10.1249/JES.000000000000204)
- 546 44. Sawicki GS, Beck ON, Kang I, Young AJ. 2020 The exoskeleton expansion: improving walking  
547 and running economy. *J. NeuroEngineering Rehabil.* **17**, 25. (doi:10.1186/s12984-020-00663-9)
- 548 45. Bennett MB, Ker RF, Imery NJ, Alexander1 RMcN. 1986 Mechanical properties of various  
549 mammalian tendons. *J. Zool.* **209**, 537–548. (doi:10.1111/j.1469-7998.1986.tb03609.x)



- 550 46. Pollock CM, Shadwick RE. 1994 Relationship between body mass and biomechanical properties  
551 of limb tendons in adult mammals. *Am. J. Physiol.* **266**, R1016-1021.  
552 (doi:10.1152/ajpregu.1994.266.3.R1016)
- 553 47. Fellin RE, Rose WC, Royer TD, Davis IS. 2010 Comparison of methods for kinematic  
554 identification of footstrike and toe-off during overground and treadmill running. *J. Sci. Med. Sport*  
555 **13**, 646–650. (doi:10.1016/j.jsams.2010.03.006)
- 556 48. Lutz GJ, Rome LC. 1996 Muscle function during jumping in frogs. I. Sarcomere length change,  
557 EMG pattern, and jumping performance. *Am. J. Physiol.* **271**, C563-570.
- 558 49. An KN, Takahashi K, Harrigan TP, Chao EY. 1984 Determination of muscle orientations and  
559 moment arms. *J. Biomech. Eng.* **106**, 280–282.
- 560 50. Herzog W, Read L. 1993 Lines of Action and Moment Arms of the Major Force-Carrying  
561 Structures Crossing the Human Knee-Joint. *J. Anat.* **182**, 213–230.
- 562 51. Hawkins D, Hull ML. 1990 A method for determining lower extremity muscle-tendon lengths during  
563 flexion/extension movements. *J. Biomech.* **23**, 487–494. (doi:10.1016/0021-9290(90)90304-L)
- 564 52. Giannakou E, Aggeloussis N, Arampatzis A. 2011 Reproducibility of gastrocnemius medialis  
565 muscle architecture during treadmill running. *J. Electromyogr. Kinesiol. Off. J. Int. Soc.*  
566 *Electrophysiol. Kinesiol.* **21**, 1081–1086. (doi:10.1016/j.jelekin.2011.06.004)
- 567 53. Fukunaga T, Kubo K, Kawakami Y, Fukashiro S, Kanehisa H, Maganaris CN. 2001 In vivo  
568 behaviour of human muscle tendon during walking. *Proc. R. Soc. Lond. B Biol. Sci.* **268**, 229–233.  
569 (doi:10.1098/rspb.2000.1361)
- 570 54. Hof AL, van den Berg Jw. 1977 Linearity between the weighted sum of the EMGs of the human  
571 triceps surae and the total torque. *J. Biomech.* **10**, 529–539. (doi:10.1016/0021-9290(77)90033-1)
- 572 55. Herzog W, Abrahamse SK, ter Keurs HE. 1990 Theoretical determination of force-length relations  
573 of intact human skeletal muscles using the cross-bridge model. *Pflugers Arch.* **416**, 113–119.
- 574 56. Arampatzis A, Morey-Klapsing G, Karamanidis K, DeMonte G, Stafilidis S, Brüggemann G-P.  
575 2005 Differences between measured and resultant joint moments during isometric contractions at  
576 the ankle joint. *J. Biomech.* **38**, 885–892. (doi:10.1016/j.jbiomech.2004.04.027)
- 577 57. Arampatzis A, Karamanidis K, De Monte G, Stafilidis S, Morey-Klapsing G, Brüggemann G-P.  
578 2004 Differences between measured and resultant joint moments during voluntary and artificially  
579 elicited isometric knee extension contractions. *Clin. Biomech.* **19**, 277–283.  
580 (doi:10.1016/j.clinbiomech.2003.11.011)
- 581 58. Mademli L, Arampatzis A, Morey-Klapsing G, Brüggemann G-P. 2004 Effect of ankle joint position  
582 and electrode placement on the estimation of the antagonistic moment during maximal  
583 plantarflexion. *J. Electromyogr. Kinesiol.* **14**, 591–597. (doi:10.1016/j.jelekin.2004.03.006)
- 584 59. Luden N, Minchev K, Hayes E, Louis E, Trappe T, Trappe S. 2008 Human vastus lateralis and  
585 soleus muscles display divergent cellular contractile properties. *Am. J. Physiol. Regul. Integr.*  
586 *Comp. Physiol.* **295**, R1593-1598. (doi:10.1152/ajpregu.90564.2008)
- 587 60. Ranatunga KW. 1984 The force-velocity relation of rat fast- and slow-twitch muscles examined at  
588 different temperatures. *J. Physiol.* **351**, 517–529. (doi:10.1113/jphysiol.1984.sp015260)
- 589 61. Edgerton VR, Smith JL, Simpson DR. 1975 Muscle fibre type populations of human leg muscles.  
590 *Histochem. J.* **7**, 259–266.
- 591 62. Larsson L, Moss RL. 1993 Maximum velocity of shortening in relation to myosin isoform  
592 composition in single fibres from human skeletal muscles. *J. Physiol.* **472**, 595–614.  
593 (doi:10.1113/jphysiol.1993.sp019964)

- 594 63. Johnson MA, Polgar J, Weightman D, Appleton D. 1973 Data on the distribution of fibre types in  
595 thirty-six human muscles. An autopsy study. *J. Neurol. Sci.* **18**, 111–129. (doi:10.1016/0022-  
596 510x(73)90023-3)
- 597 64. Winters JM, Stark L. 1985 Analysis of Fundamental Human Movement Patterns Through the Use  
598 of In-Depth Antagonistic Muscle Models. *IEEE Trans. Biomed. Eng.* **BME-32**, 826–839.  
599 (doi:10.1109/TBME.1985.325498)
- 600 65. Winters JM, Stark L. 1988 Estimated mechanical properties of synergistic muscles involved in  
601 movements of a variety of human joints. *J. Biomech.* **21**, 1027–1041. (doi:10.1016/0021-  
602 9290(88)90249-7)
- 603 66. UMBERGER BR, GERRITSEN KGM, MARTIN PE. 2003 A Model of Human Muscle Energy  
604 Expenditure. *Comput. Methods Biomech. Biomed. Engin.* **6**, 99–111.  
605 (doi:10.1080/1025584031000091678)
- 606 67. Pataky TC. 2012 One-dimensional statistical parametric mapping in Python. *Comput. Methods*  
607 *Biomech. Biomed. Engin.* **15**, 295–301. (doi:10.1080/10255842.2010.527837)
- 608
